# Supplementary material
Source: MDPI journal article supplement (https://www.mdpi.com/2226-4310/8/7/194)
Supplement: s1 [file s1]

## Supplemental Material

Table S1 shows the results from the circulation generator module (CGM) on the maximum possible circulations of wake vortex (WV) generated, in realistic scenarios, by all the aircraft for which the necessary data are available in the Base of Aircraft Data (BADA) version 4.1, which excludes the propeller-driven light aircraft SR20 and SR22. In this table,  $\Gamma_0$  is the initial circulation of the WV, and  $\Gamma_{Sarp}$  and  $\Gamma_{D2P}$  are the circulations of the WV as obtained from Sarpkaya's and the P2P/D2P decay models, respectively, at different horizontal separation distances  $d_{SEP}$  between the generator aircraft and follower aircraft. The table also shows the time separation  $t_{SEP}$  between aircraft for the given flight velocity  $U_\infty$ , and the WV sinking or descent in altitude  $h_{WV}$ , equivalent to the generator-follower vertical separation.

**Table S1.** Maximum circulations of the wake vortex generated by several aircraft, and flight conditions of the generator.

| Generator  | mass<br>[t] | $U_\infty$<br>[m/s] | $M$<br>[-] | FL<br>[-] | $r_c$<br>[m] | $b_0$<br>[m] | $\Gamma_0$<br>[m <sup>2</sup> /s] | $d_{SEP}$<br>[NM] | $\Gamma_{Sarp}$<br>[m <sup>2</sup> /s] | $\Gamma_{D2P}$<br>[m <sup>2</sup> /s] | $t_{SEP}$<br>[s] | $h_{WV}(t_{SEP})$<br>[ft] |
|------------|-------------|---------------------|------------|-----------|--------------|--------------|-----------------------------------|-------------------|----------------------------------------|---------------------------------------|------------------|---------------------------|
| A300B4-203 | 132         | 221.41              | 0.73       | 300       | 1.57         | 35.21        | 362.43                            | 0.5               | 358.62                                 | 343.83                                | 4.18             | 22                        |
|            |             |                     |            |           |              |              |                                   | 3                 | 340.14                                 | 326.84                                | 25.09            | 130                       |
|            |             |                     |            |           |              |              |                                   | 5                 | 326.04                                 | 313.86                                | 41.82            | 213                       |
|            |             |                     |            |           |              |              |                                   | 30.2              | 191.45                                 | 206.44                                | 252.3            | 1000                      |
|            |             |                     |            |           |              |              |                                   | 135.6             | 20.55                                  | n/a                                   | 1134.3           | 2000                      |
| A300B4-601 | 157         | 240.40              | 0.79       | 300       | 1.57         | 35.22        | 396.30                            | 0.5               | 392.19                                 | 375.93                                | 3.85             | 22                        |
|            |             |                     |            |           |              |              |                                   | 3                 | 372.28                                 | 357.23                                | 23.11            | 131                       |
|            |             |                     |            |           |              |              |                                   | 5                 | 357.08                                 | 342.96                                | 38.52            | 215                       |
|            |             |                     |            |           |              |              |                                   | 29.7              | 213.50                                 | 226.59                                | 228.6            | 1000                      |
|            |             |                     |            |           |              |              |                                   | 122.9             | 30.61                                  | n/a                                   | 946.5            | 2000                      |
| A300B4-622 | 112         | 233.35              | 0.79       | 400       | 1.57         | 35.22        | 441.79                            | 0.5               | 436.67                                 | 418.45                                | 3.97             | 26                        |
|            |             |                     |            |           |              |              |                                   | 3                 | 411.93                                 | 394.63                                | 23.81            | 150                       |
|            |             |                     |            |           |              |              |                                   | 5                 | 393.15                                 | 376.64                                | 39.68            | 245                       |
|            |             |                     |            |           |              |              |                                   | 25.6              | 243.21                                 | 253.56                                | 203.1            | 1000                      |
|            |             |                     |            |           |              |              |                                   | 98.36             | 44.55                                  | n/a                                   | 780.6            | 2000                      |
| A310-204   | 98          | 226.26              | 0.77       | 411       | 1.54         | 34.48        | 428.65                            | 0.5               | 423.64                                 | 405.80                                | 4.09             | 26                        |
|            |             |                     |            |           |              |              |                                   | 3                 | 398.44                                 | 381.71                                | 24.56            | 153                       |
|            |             |                     |            |           |              |              |                                   | 5                 | 379.49                                 | 363.59                                | 40.93            | 250                       |
|            |             |                     |            |           |              |              |                                   | 25.3              | 231.69                                 | 243.13                                | 206.7            | 1000                      |
|            |             |                     |            |           |              |              |                                   | 103.1             | 34.80                                  | n/a                                   | 843.6            | 2000                      |
| A310-222   | 90          | 227.82              | 0.77       | 411       | 1.54         | 34.48        | 393.36                            | 0.5               | 388.93                                 | 372.80                                | 4.06             | 24                        |
|            |             |                     |            |           |              |              |                                   | 3                 | 367.51                                 | 352.58                                | 24.39            | 140                       |
|            |             |                     |            |           |              |              |                                   | 5                 | 351.22                                 | 337.25                                | 40.65            | 228                       |
|            |             |                     |            |           |              |              |                                   | 27.9              | 208.85                                 | 222.38                                | 227.1            | 1000                      |
|            |             |                     |            |           |              |              |                                   | 122.6             | 24.46                                  | n/a                                   | 996.3            | 2000                      |
| A310-308   | 110         | 227.80              | 0.77       | 411       | 1.54         | 34.48        | 482.53                            | 0.5               | 476.18                                 | 456.15                                | 4.07             | 29                        |
|            |             |                     |            |           |              |              |                                   | 3                 | 445.65                                 | 425.97                                | 24.39            | 171                       |
|            |             |                     |            |           |              |              |                                   | 5                 | 422.65                                 | 403.54                                | 40.65            | 278                       |
|            |             |                     |            |           |              |              |                                   | 22.4              | 266.78                                 | 274.78                                | 181.8            | 1000                      |
|            |             |                     |            |           |              |              |                                   | 84.6              | 51.20                                  | n/a                                   | 688.2            | 2000                      |
| A310-322   | 98          | 231.35              | 0.78       | 411       | 1.54         | 34.48        | 419.22                            | 0.5               | 414.34                                 | 397.08                                | 4.00             | 25                        |
|            |             |                     |            |           |              |              |                                   | 3                 | 390.77                                 | 374.51                                | 24.02            | 147                       |
|            |             |                     |            |           |              |              |                                   | 5                 | 372.89                                 | 357.46                                | 40.03            | 239                       |
|            |             |                     |            |           |              |              |                                   | 26.5              | 225.56                                 | 237.58                                | 211.8            | 1000                      |
|            |             |                     |            |           |              |              |                                   | 109.8             | 31.99                                  | n/a                                   | 879.3            | 2000                      |
| A310-324   | 98          | 230.56              | 0.78       | 411       | 1.54         | 34.48        | 420.65                            | 0.5               | 415.72                                 | 398.41                                | 4.02             | 25                        |
|            |             |                     |            |           |              |              |                                   | 3                 | 391.94                                 | 375.60                                | 24.10            | 148                       |
|            |             |                     |            |           |              |              |                                   | 5                 | 373.89                                 | 358.40                                | 40.16            | 241                       |
|            |             |                     |            |           |              |              |                                   | 26.3              | 226.57                                 | 238.47                                | 210.9            | 1000                      |
|            |             |                     |            |           |              |              |                                   | 108.8             | 32.42                                  | n/a                                   | 873.6            | 2000                      |
| A318-112   | 54          | 221.21              | 0.75       | 398       | 1.19         | 26.78        | 295.85                            | 0.5               | 291.63                                 | 279.51                                | 4.19             | 24                        |
|            |             |                     |            |           |              |              |                                   | 3                 | 271.42                                 | 260.19                                | 25.12            | 139                       |
|            |             |                     |            |           |              |              |                                   | 5                 | 256.26                                 | 245.90                                | 41.86            | 224                       |

|          |     |        |      |     |      |       |        |      |        |        |       |      |
|----------|-----|--------|------|-----|------|-------|--------|------|--------|--------|-------|------|
| A319-114 | 56  | 223.18 | 0.76 | 398 | 1.19 | 26.78 | 301.86 | 31.6 | 119.43 | n/a    | 264.3 | 1000 |
|          |     |        |      |     |      |       |        | n/a  | n/a    | n/a    | n/a   | 2000 |
|          |     |        |      |     |      |       |        | 0.5  | 297.53 | 285.13 | 4.15  | 24   |
|          |     |        |      |     |      |       |        | 3    | 276.77 | 265.21 | 24.89 | 140  |
|          |     |        |      |     |      |       |        | 5    | 261.22 | 250.49 | 41.49 | 227  |
| A319-131 | 56  | 223.15 | 0.76 | 398 | 1.19 | 26.78 | 301.91 | 31.1 | 122.70 | n/a    | 258.3 | 1000 |
|          |     |        |      |     |      |       |        | n/a  | n/a    | n/a    | n/a   | 2000 |
|          |     |        |      |     |      |       |        | 0.5  | 297.57 | 285.18 | 4.15  | 24   |
|          |     |        |      |     |      |       |        | 3    | 276.81 | 265.25 | 24.90 | 140  |
|          |     |        |      |     |      |       |        | 5    | 261.25 | 250.52 | 41.50 | 227  |
| A320-212 | 50  | 221.0  | 0.75 | 398 | 1.19 | 26.78 | 272.50 | 31.1 | 122.83 | n/a    | 258.0 | 1000 |
|          |     |        |      |     |      |       |        | n/a  | n/a    | n/a    | n/a   | 2000 |
|          |     |        |      |     |      |       |        | 0.5  | 268.84 | 257.73 | 4.19  | 22   |
|          |     |        |      |     |      |       |        | 3    | 251.28 | 241.26 | 25.14 | 128  |
|          |     |        |      |     |      |       |        | 5    | 238.06 | 228.96 | 41.91 | 208  |
| A320-214 | 50  | 220.68 | 0.75 | 411 | 1.19 | 26.78 | 290.43 | 34.7 | 106.77 | n/a    | 290.6 | 1000 |
|          |     |        |      |     |      |       |        | n/a  | n/a    | n/a    | n/a   | 2000 |
|          |     |        |      |     |      |       |        | 0.5  | 286.34 | 274.45 | 4.20  | 24   |
|          |     |        |      |     |      |       |        | 3    | 266.71 | 255.77 | 25.18 | 136  |
|          |     |        |      |     |      |       |        | 5    | 251.99 | 241.93 | 41.96 | 220  |
| A320-231 | 50  | 219.51 | 0.74 | 398 | 1.19 | 26.78 | 274.30 | 32.2 | 116.47 | n/a    | 270.0 | 1000 |
|          |     |        |      |     |      |       |        | n/a  | n/a    | n/a    | n/a   | 2000 |
|          |     |        |      |     |      |       |        | 0.5  | 270.58 | 259.39 | 4.22  | 22   |
|          |     |        |      |     |      |       |        | 3    | 252.70 | 242.60 | 25.31 | 130  |
|          |     |        |      |     |      |       |        | 5    | 239.26 | 230.08 | 42.19 | 210  |
| A320-232 | 51  | 223.09 | 0.76 | 411 | 1.19 | 26.78 | 291.04 | 34.2 | 107.77 | n/a    | 288.3 | 1000 |
|          |     |        |      |     |      |       |        | n/a  | n/a    | n/a    | n/a   | 2000 |
|          |     |        |      |     |      |       |        | 0.5  | 286.97 | 275.05 | 4.15  | 23   |
|          |     |        |      |     |      |       |        | 3    | 265.48 | 256.49 | 24.91 | 135  |
|          |     |        |      |     |      |       |        | 5    | 249.90 | 242.72 | 41.51 | 219  |
| A321-111 | 54  | 220.65 | 0.75 | 398 | 1.20 | 26.82 | 293.71 | 32.5 | 116.78 | n/a    | 269.4 | 1000 |
|          |     |        |      |     |      |       |        | n/a  | n/a    | n/a    | n/a   | 2000 |
|          |     |        |      |     |      |       |        | 0.5  | 289.55 | 277.51 | 4.20  | 24   |
|          |     |        |      |     |      |       |        | 3    | 269.58 | 258.47 | 25.18 | 138  |
|          |     |        |      |     |      |       |        | 5    | 254.61 | 244.38 | 41.97 | 223  |
| A321-131 | 54  | 219.67 | 0.74 | 398 | 1.20 | 26.82 | 295.03 | 31.8 | 118.45 | n/a    | 266.7 | 1000 |
|          |     |        |      |     |      |       |        | n/a  | n/a    | n/a    | n/a   | 2000 |
|          |     |        |      |     |      |       |        | 0.5  | 290.82 | 278.73 | 4.22  | 24   |
|          |     |        |      |     |      |       |        | 3    | 270.61 | 259.44 | 25.29 | 139  |
|          |     |        |      |     |      |       |        | 5    | 255.46 | 245.17 | 42.16 | 225  |
| A330-203 | 151 | 231.11 | 0.78 | 415 | 2.11 | 47.36 | 483.76 | 31.5 | 119.23 | n/a    | 265.2 | 1000 |
|          |     |        |      |     |      |       |        | n/a  | n/a    | n/a    | n/a   | 2000 |
|          |     |        |      |     |      |       |        | 0.5  | 480.06 | 460.27 | 4.01  | 21   |
|          |     |        |      |     |      |       |        | 3    | 461.97 | 444.12 | 24.04 | 125  |
|          |     |        |      |     |      |       |        | 5    | 448.00 | 431.54 | 40.07 | 205  |
| A330-223 | 150 | 233.57 | 0.79 | 415 | 2.11 | 47.36 | 472.49 | 29.1 | 309.63 | 316.59 | 232.8 | 1000 |
|          |     |        |      |     |      |       |        | 82.9 | 135.36 | n/a    | 664.5 | 2000 |
|          |     |        |      |     |      |       |        | 0.5  | 468.97 | 449.66 | 3.96  | 21   |
|          |     |        |      |     |      |       |        | 3    | 451.79 | 434.41 | 23.79 | 121  |
|          |     |        |      |     |      |       |        | 5    | 438.50 | 422.51 | 39.65 | 199  |
| A330-243 | 150 | 231.73 | 0.79 | 415 | 2.11 | 47.36 | 476.24 | 30.1 | 301.35 | 309.02 | 238.8 | 1000 |
|          |     |        |      |     |      |       |        | 86.3 | 130.15 | n/a    | 684.6 | 2000 |
|          |     |        |      |     |      |       |        | 0.5  | 472.65 | 453.18 | 4.00  | 21   |
|          |     |        |      |     |      |       |        | 3    | 455.09 | 437.56 | 23.98 | 123  |
|          |     |        |      |     |      |       |        | 5    | 441.52 | 425.39 | 39.96 | 202  |
| A330-301 | 138 | 225.50 | 0.76 | 415 | 2.11 | 47.36 | 451.10 | 29.6 | 304.15 | 311.57 | 236.7 | 1000 |
|          |     |        |      |     |      |       |        | 84.8 | 131.90 | n/a    | 677.7 | 2000 |
|          |     |        |      |     |      |       |        | 0.5  | 447.74 | 429.34 | 4.11  | 20   |
|          |     |        |      |     |      |       |        | 3    | 431.32 | 414.93 | 24.64 | 120  |
|          |     |        |      |     |      |       |        | 5    | 418.62 | 403.69 | 41.06 | 196  |
|          |     |        |      |     |      |       |        | 30.6 | 285.71 | 294.70 | 251.0 | 1000 |
|          |     |        |      |     |      |       |        | 88.4 | 120.34 | n/a    | 726.2 | 2000 |

|           |     |        |      |     |      |       |        |      |        |        |       |      |
|-----------|-----|--------|------|-----|------|-------|--------|------|--------|--------|-------|------|
| A330-321  | 138 | 229.38 | 0.78 | 415 | 2.11 | 47.36 | 443.47 | 0.5  | 440.27 | 422.18 | 4.04  | 20   |
|           |     |        |      |     |      |       |        | 3    | 424.59 | 408.48 | 24.22 | 116  |
|           |     |        |      |     |      |       |        | 5    | 412.45 | 397.78 | 40.37 | 190  |
|           |     |        |      |     |      |       |        | 31.7 | 280.17 | 289.62 | 255.6 | 1000 |
|           |     |        |      |     |      |       |        | 91.9 | 116.88 | n/a    | 742.2 | 2000 |
| A330-341  | 170 | 233.68 | 0.79 | 411 | 2.11 | 47.36 | 525.57 | 0.5  | 521.34 | 499.79 | 3.96  | 23   |
|           |     |        |      |     |      |       |        | 3    | 500.69 | 480.96 | 23.78 | 134  |
|           |     |        |      |     |      |       |        | 5    | 484.76 | 466.34 | 39.63 | 220  |
|           |     |        |      |     |      |       |        | 26.9 | 340.17 | 344.46 | 213.3 | 1000 |
|           |     |        |      |     |      |       |        | 75.6 | 154.88 | n/a    | 599.1 | 2000 |
| A340-213  | 167 | 234.54 | 0.79 | 415 | 2.11 | 47.36 | 525.78 | 0.5  | 521.56 | 500.01 | 3.95  | 23   |
|           |     |        |      |     |      |       |        | 3    | 500.97 | 481.23 | 23.69 | 134  |
|           |     |        |      |     |      |       |        | 5    | 485.09 | 466.65 | 39.48 | 219  |
|           |     |        |      |     |      |       |        | 27.0 | 340.27 | 344.55 | 213.3 | 1000 |
|           |     |        |      |     |      |       |        | 75.8 | 154.98 | n/a    | 598.8 | 2000 |
| A340-313  | 167 | 233.63 | 0.79 | 415 | 2.11 | 47.36 | 527.83 | 0.5  | 523.57 | 501.93 | 3.96  | 23   |
|           |     |        |      |     |      |       |        | 3    | 502.76 | 482.93 | 23.78 | 135  |
|           |     |        |      |     |      |       |        | 5    | 486.72 | 468.19 | 39.64 | 221  |
|           |     |        |      |     |      |       |        | 26.8 | 341.79 | 345.93 | 212.4 | 1000 |
|           |     |        |      |     |      |       |        | 75.2 | 155.88 | n/a    | 596.1 | 2000 |
| A340-541  | 242 | 241.07 | 0.82 | 415 | 2.22 | 49.83 | 703.74 | 0.5  | 697.45 | 668.35 | 3.84  | 28   |
|           |     |        |      |     |      |       |        | 3    | 666.84 | 638.89 | 23.05 | 165  |
|           |     |        |      |     |      |       |        | 5    | 643.32 | 616.21 | 38.41 | 270  |
|           |     |        |      |     |      |       |        | 21.3 | 480.27 | 472.32 | 163.5 | 1000 |
|           |     |        |      |     |      |       |        | 56.2 | 256.81 | n/a    | 431.4 | 2000 |
| A340-642  | 247 | 241.65 | 0.82 | 415 | 2.22 | 49.83 | 717.13 | 0.5  | 710.64 | 680.96 | 3.83  | 29   |
|           |     |        |      |     |      |       |        | 3    | 679.09 | 650.46 | 22.99 | 167  |
|           |     |        |      |     |      |       |        | 5    | 654.86 | 627.00 | 38.32 | 275  |
|           |     |        |      |     |      |       |        | 20.9 | 490.52 | 481.53 | 160.2 | 1000 |
|           |     |        |      |     |      |       |        | 55.0 | 263.83 | n/a    | 421.8 | 2000 |
| A380-841  | 541 | 247.60 | 0.82 | 315 | 2.79 | 62.64 | 790.25 | 0.5  | 785.13 | 752.57 | 3.74  | 25   |
|           |     |        |      |     |      |       |        | 3    | 760.02 | 729.52 | 22.44 | 145  |
|           |     |        |      |     |      |       |        | 5    | 740.51 | 711.47 | 37.40 | 238  |
|           |     |        |      |     |      |       |        | 23.6 | 581.26 | 571.10 | 176.7 | 1000 |
|           |     |        |      |     |      |       |        | 57.9 | 372.37 | 263.04 | 432.9 | 2000 |
| A380-861  | 370 | 247.07 | 0.84 | 431 | 2.79 | 62.64 | 902.39 | 0.5  | 895.92 | 858.60 | 3.75  | 28   |
|           |     |        |      |     |      |       |        | 3    | 864.22 | 828.54 | 22.49 | 165  |
|           |     |        |      |     |      |       |        | 5    | 839.67 | 805.13 | 37.48 | 271  |
|           |     |        |      |     |      |       |        | 20.5 | 671.45 | 653.16 | 153.9 | 1000 |
|           |     |        |      |     |      |       |        | 49.8 | 440.42 | 332.44 | 373.3 | 2000 |
| B737W24   | 56  | 225.33 | 0.76 | 410 | 1.25 | 28.11 | 302.13 | 0.5  | 298.16 | 285.80 | 4.11  | 23   |
|           |     |        |      |     |      |       |        | 3    | 279.10 | 267.76 | 24.66 | 133  |
|           |     |        |      |     |      |       |        | 5    | 264.73 | 254.28 | 41.10 | 216  |
|           |     |        |      |     |      |       |        | 32.3 | 128.67 | 13.69  | 265.5 | 1000 |
|           |     |        |      |     |      |       |        | n/a  | n/a    | n/a    | n/a   | 2000 |
| B738W26   | 51  | 221.89 | 0.75 | 410 | 1.25 | 28.11 | 281.07 | 0.5  | 277.52 | 266.07 | 4.17  | 22   |
|           |     |        |      |     |      |       |        | 3    | 260.44 | 250.18 | 25.04 | 126  |
|           |     |        |      |     |      |       |        | 5    | 247.54 | 238.24 | 41.73 | 204  |
|           |     |        |      |     |      |       |        | 34.5 | 116.87 | 8.47   | 288.3 | 1000 |
|           |     |        |      |     |      |       |        | n/a  | n/a    | n/a    | n/a   | 2000 |
| B739ERW26 | 55  | 224.75 | 0.76 | 410 | 1.25 | 28.11 | 298.99 | 0.5  | 295.09 | 282.86 | 4.12  | 23   |
|           |     |        |      |     |      |       |        | 3    | 276.32 | 265.15 | 24.72 | 132  |
|           |     |        |      |     |      |       |        | 5    | 262.17 | 251.90 | 41.20 | 214  |
|           |     |        |      |     |      |       |        | 32.6 | 126.97 | 13.18  | 268.5 | 1000 |
|           |     |        |      |     |      |       |        | n/a  | n/a    | n/a    | n/a   | 2000 |
| B742RR    | 298 | 248.65 | 0.83 | 325 | 2.09 | 46.84 | 601.38 | 0.5  | 596.25 | 571.46 | 3.72  | 25   |
|           |     |        |      |     |      |       |        | 3    | 571.25 | 547.81 | 22.34 | 146  |
|           |     |        |      |     |      |       |        | 5    | 552.01 | 529.55 | 37.24 | 239  |
|           |     |        |      |     |      |       |        | 24.6 | 394.47 | 393.47 | 183.3 | 1000 |
|           |     |        |      |     |      |       |        | 67.9 | 187.85 | n/a    | 505.8 | 2000 |
| B743PW    | 302 | 251.00 | 0.84 | 325 | 2.09 | 46.84 | 605.19 | 0.5  | 600.05 | 575.09 | 3.69  | 25   |
|           |     |        |      |     |      |       |        | 3    | 575.00 | 551.37 | 22.14 | 145  |

|            |     |        |      |     |      |       |        |       |        |        |       |      |
|------------|-----|--------|------|-----|------|-------|--------|-------|--------|--------|-------|------|
|            |     |        |      |     |      |       |        | 5     | 555.72 | 533.04 | 36.89 | 238  |
|            |     |        |      |     |      |       |        | 24.6  | 397.54 | 396.21 | 181.8 | 1000 |
|            |     |        |      |     |      |       |        | 68.0  | 189.69 | n/a    | 501.9 | 2000 |
| B744ERGE   | 330 | 246.93 | 0.82 | 325 | 2.27 | 50.99 | 617.37 | 0.5   | 612.67 | 587.27 | 3.75  | 24   |
|            |     |        |      |     |      |       |        | 3     | 589.73 | 566.04 | 22.50 | 139  |
|            |     |        |      |     |      |       |        | 5     | 572.00 | 549.53 | 37.50 | 228  |
|            |     |        |      |     |      |       |        | 25.5  | 418.17 | 416.79 | 191.4 | 1000 |
|            |     |        |      |     |      |       |        | 67.9  | 219.03 | n/a    | 509.1 | 2000 |
| B744GE     | 377 | 250.45 | 0.84 | 325 | 2.27 | 50.99 | 695.03 | 0.5   | 689.33 | 660.62 | 3.70  | 26   |
|            |     |        |      |     |      |       |        | 3     | 661.53 | 634.14 | 22.18 | 154  |
|            |     |        |      |     |      |       |        | 5     | 640.10 | 613.65 | 36.97 | 252  |
|            |     |        |      |     |      |       |        | 22.8  | 477.15 | 470.15 | 168.9 | 1000 |
|            |     |        |      |     |      |       |        | 59.9  | 259.27 | n/a    | 442.8 | 2000 |
| B748F      | 287 | 244.70 | 0.83 | 421 | 2.39 | 53.72 | 786.94 | 0.5   | 780.29 | 747.71 | 3.78  | 29   |
|            |     |        |      |     |      |       |        | 3     | 747.87 | 716.44 | 22.71 | 169  |
|            |     |        |      |     |      |       |        | 5     | 722.91 | 692.30 | 37.84 | 277  |
|            |     |        |      |     |      |       |        | 20.5  | 555.78 | 542.69 | 155.1 | 1000 |
|            |     |        |      |     |      |       |        | 52.2  | 324.69 | n/a    | 394.8 | 2000 |
| B752WRR40  | 75  | 226.16 | 0.77 | 420 | 1.33 | 29.89 | 398.32 | 0.5   | 392.52 | 376.00 | 4.09  | 28   |
|            |     |        |      |     |      |       |        | 3     | 364.76 | 348.58 | 24.57 | 163  |
|            |     |        |      |     |      |       |        | 5     | 343.98 | 328.42 | 40.94 | 265  |
|            |     |        |      |     |      |       |        | 24.7  | 192.82 | 102.05 | 202.5 | 1000 |
|            |     |        |      |     |      |       |        | n/a   | n/a    | n/a    | n/a   | 2000 |
| B753RR     | 80  | 227.12 | 0.77 | 420 | 1.33 | 29.89 | 419.92 | 0.5   | 413.58 | 396.10 | 4.08  | 30   |
|            |     |        |      |     |      |       |        | 3     | 383.30 | 365.84 | 24.46 | 171  |
|            |     |        |      |     |      |       |        | 5     | 360.68 | 343.75 | 40.77 | 277  |
|            |     |        |      |     |      |       |        | 23.4  | 205.87 | 112.62 | 191.1 | 1000 |
|            |     |        |      |     |      |       |        | n/a   | n/a    | n/a    | n/a   | 2000 |
| B762ERPW56 | 116 | 228.65 | 0.77 | 431 | 1.67 | 37.36 | 514.73 | 0.5   | 508.54 | 487.22 | 4.05  | 29   |
|            |     |        |      |     |      |       |        | 3     | 478.66 | 457.96 | 24.30 | 168  |
|            |     |        |      |     |      |       |        | 5     | 456.02 | 435.98 | 40.50 | 274  |
|            |     |        |      |     |      |       |        | 22.3  | 300.21 | 305.25 | 180.3 | 1000 |
|            |     |        |      |     |      |       |        | 73.9  | 85.96  | n/a    | 598.5 | 2000 |
| B762GE50   | 93  | 227.02 | 0.77 | 431 | 1.67 | 37.36 | 413.43 | 0.5   | 409.19 | 392.25 | 4.08  | 23   |
|            |     |        |      |     |      |       |        | 3     | 388.61 | 373.10 | 24.47 | 137  |
|            |     |        |      |     |      |       |        | 5     | 372.89 | 358.46 | 40.79 | 223  |
|            |     |        |      |     |      |       |        | 28.0  | 232.02 | 243.60 | 228.3 | 1000 |
|            |     |        |      |     |      |       |        | 101.8 | 50.61  | n/a    | 830.1 | 2000 |
| B763ERGE61 | 121 | 227.41 | 0.77 | 431 | 1.67 | 37.36 | 539.82 | 0.5   | 533.04 | 510.63 | 4.07  | 30   |
|            |     |        |      |     |      |       |        | 3     | 500.42 | 478.34 | 24.43 | 177  |
|            |     |        |      |     |      |       |        | 5     | 475.76 | 454.21 | 40.72 | 288  |
|            |     |        |      |     |      |       |        | 21.0  | 317.30 | 320.56 | 171.3 | 1000 |
|            |     |        |      |     |      |       |        | 68.8  | 94.99  | n/a    | 560.1 | 2000 |
| B763PW60   | 103 | 229.42 | 0.78 | 431 | 1.67 | 37.36 | 454.57 | 0.5   | 449.61 | 430.91 | 4.04  | 25   |
|            |     |        |      |     |      |       |        | 3     | 425.60 | 408.06 | 24.22 | 149  |
|            |     |        |      |     |      |       |        | 5     | 407.32 | 390.70 | 40.36 | 242  |
|            |     |        |      |     |      |       |        | 25.5  | 259.55 | 268.60 | 206.1 | 1000 |
|            |     |        |      |     |      |       |        | 88.8  | 64.70  | n/a    | 717.0 | 2000 |
| B764ER     | 194 | 233.40 | 0.78 | 315 | 1.82 | 40.78 | 461.93 | 0.5   | 457.59 | 438.65 | 3.97  | 23   |
|            |     |        |      |     |      |       |        | 3     | 434.52 | 419.07 | 23.81 | 137  |
|            |     |        |      |     |      |       |        | 5     | 420.36 | 404.02 | 39.68 | 224  |
|            |     |        |      |     |      |       |        | 27.3  | 275.87 | 284.07 | 216.9 | 1000 |
|            |     |        |      |     |      |       |        | 86.7  | 90.01  | n/a    | 688.2 | 2000 |
| B772LR     | 330 | 246.62 | 0.82 | 315 | 2.20 | 49.43 | 613.86 | 0.5   | 608.96 | 583.68 | 3.75  | 24   |
|            |     |        |      |     |      |       |        | 3     | 585.04 | 561.34 | 22.53 | 142  |
|            |     |        |      |     |      |       |        | 5     | 566.58 | 544.02 | 37.55 | 234  |
|            |     |        |      |     |      |       |        | 25.0  | 411.29 | 409.85 | 187.6 | 1000 |
|            |     |        |      |     |      |       |        | 67.2  | 208.88 | n/a    | 505.0 | 2000 |
| B772RR92   | 186 | 243.43 | 0.82 | 431 | 2.13 | 47.85 | 604.45 | 0.5   | 599.35 | 574.45 | 3.80  | 25   |
|            |     |        |      |     |      |       |        | 3     | 574.48 | 551.06 | 22.82 | 146  |
|            |     |        |      |     |      |       |        | 5     | 555.33 | 532.98 | 38.04 | 240  |
|            |     |        |      |     |      |       |        | 24.4  | 399.92 | 398.82 | 185.4 | 1000 |

|              |     |        |      |     |      |       |        |      |        |        |       |      |
|--------------|-----|--------|------|-----|------|-------|--------|------|--------|--------|-------|------|
| B773ERGE115B | 334 | 248.21 | 0.82 | 315 | 2.27 | 50.89 | 599.37 | 66.6 | 195.35 | n/a    | 507.0 | 2000 |
|              |     |        |      |     |      |       |        | 0.5  | 594.92 | 570.28 | 3.73  | 23   |
|              |     |        |      |     |      |       |        | 3    | 573.17 | 550.29 | 22.38 | 134  |
|              |     |        |      |     |      |       |        | 5    | 556.35 | 534.71 | 37.31 | 221  |
|              |     |        |      |     |      |       |        | 26.4 | 404.37 | 404.21 | 197.1 | 1000 |
| B773RR92     | 284 | 248.57 | 0.83 | 315 | 2.13 | 47.85 | 542.07 | 70.6 | 209.35 | n/a    | 526.8 | 2000 |
|              |     |        |      |     |      |       |        | 0.5  | 537.95 | 515.69 | 3.73  | 22   |
|              |     |        |      |     |      |       |        | 3    | 517.77 | 497.22 | 22.35 | 129  |
|              |     |        |      |     |      |       |        | 5    | 502.18 | 482.85 | 37.25 | 212  |
|              |     |        |      |     |      |       |        | 27.9 | 353.62 | 356.87 | 208.2 | 1000 |
| B788RR       | 148 | 240.32 | 0.81 | 431 | 2.10 | 47.22 | 492.97 | 77.7 | 165.24 | n/a    | 579.0 | 2000 |
|              |     |        |      |     |      |       |        | 0.5  | 489.27 | 469.09 | 3.85  | 21   |
|              |     |        |      |     |      |       |        | 3    | 471.20 | 452.86 | 23.12 | 123  |
|              |     |        |      |     |      |       |        | 5    | 457.22 | 440.21 | 38.53 | 202  |
|              |     |        |      |     |      |       |        | 29.5 | 315.95 | 322.32 | 227.7 | 1000 |
| B73215       | 42  | 206.50 | 0.70 | 370 | 0.99 | 22.27 | 256.71 | 84.1 | 138.91 | n/a    | 648.3 | 2000 |
|              |     |        |      |     |      |       |        | 0.5  | 251.92 | 241.34 | 4.48  | 27   |
|              |     |        |      |     |      |       |        | 3    | 229.26 | 219.22 | 26.91 | 153  |
|              |     |        |      |     |      |       |        | 5    | 212.60 | 203.52 | 44.84 | 246  |
|              |     |        |      |     |      |       |        | 31.9 | 77.06  | n/a    | 286.2 | 1000 |
| B73320       | 49  | 213.53 | 0.72 | 370 | 1.01 | 22.68 | 284.86 | n/a  | n/a    | n/a    | n/a   | 2000 |
|              |     |        |      |     |      |       |        | 0.5  | 279.45 | 267.62 | 4.34  | 28   |
|              |     |        |      |     |      |       |        | 3    | 251.94 | 242.31 | 26.02 | 161  |
|              |     |        |      |     |      |       |        | 5    | 235.22 | 224.45 | 43.37 | 258  |
|              |     |        |      |     |      |       |        | 29.3 | 92.65  | n/a    | 254.4 | 1000 |
| B73423       | 54  | 214.85 | 0.73 | 370 | 1.01 | 22.68 | 314.57 | n/a  | n/a    | n/a    | n/a   | 2000 |
|              |     |        |      |     |      |       |        | 0.5  | 308.17 | 294.96 | 4.31  | 31   |
|              |     |        |      |     |      |       |        | 3    | 278.08 | 264.54 | 25.86 | 176  |
|              |     |        |      |     |      |       |        | 5    | 256.14 | 243.43 | 43.10 | 282  |
|              |     |        |      |     |      |       |        | 26.2 | 106.99 | n/a    | 226.2 | 1000 |
| B73518       | 48  | 211.92 | 0.72 | 370 | 1.01 | 22.68 | 283.83 | n/a  | n/a    | n/a    | n/a   | 2000 |
|              |     |        |      |     |      |       |        | 0.5  | 278.42 | 266.64 | 4.37  | 28   |
|              |     |        |      |     |      |       |        | 3    | 252.89 | 241.33 | 26.22 | 161  |
|              |     |        |      |     |      |       |        | 5    | 234.16 | 223.48 | 43.70 | 259  |
|              |     |        |      |     |      |       |        | 29.2 | 92.2   | n/a    | 255.3 | 1000 |
| B73622       | 52  | 224.65 | 0.76 | 410 | 1.20 | 26.96 | 295.56 | n/a  | n/a    | n/a    | n/a   | 2000 |
|              |     |        |      |     |      |       |        | 0.5  | 291.46 | 279.34 | 4.12  | 24   |
|              |     |        |      |     |      |       |        | 3    | 271.77 | 260.57 | 24.73 | 136  |
|              |     |        |      |     |      |       |        | 5    | 256.99 | 246.64 | 41.22 | 220  |
|              |     |        |      |     |      |       |        | 32.2 | 120.07 | n/a    | 265.5 | 1000 |
| F70-620      | 40  | 199.56 | 0.67 | 350 | 0.98 | 22.05 | 232.78 | n/a  | n/a    | n/a    | n/a   | 2000 |
|              |     |        |      |     |      |       |        | 0.5  | 228.54 | 219.03 | 4.64  | 25   |
|              |     |        |      |     |      |       |        | 3    | 208.46 | 199.78 | 27.84 | 145  |
|              |     |        |      |     |      |       |        | 5    | 193.67 | 186.02 | 46.40 | 233  |
|              |     |        |      |     |      |       |        | 34.7 | 64.97  | n/a    | 321.9 | 1000 |
| F100-620     | 37  | 195.08 | 0.66 | 350 | 0.98 | 22.05 | 220.13 | n/a  | n/a    | n/a    | n/a   | 2000 |
|              |     |        |      |     |      |       |        | 0.5  | 216.20 | 207.25 | 4.75  | 25   |
|              |     |        |      |     |      |       |        | 3    | 197.56 | 189.60 | 28.48 | 140  |
|              |     |        |      |     |      |       |        | 5    | 183.81 | 176.91 | 47.47 | 226  |
|              |     |        |      |     |      |       |        | 36.3 | 59.35  | n/a    | 345.0 | 1000 |
| F100-650     | 44  | 205.26 | 0.69 | 350 | 0.98 | 22.05 | 248.45 | n/a  | n/a    | n/a    | n/a   | 2000 |
|              |     |        |      |     |      |       |        | 0.5  | 243.82 | 233.60 | 4.51  | 26   |
|              |     |        |      |     |      |       |        | 3    | 221.95 | 212.35 | 27.07 | 150  |
|              |     |        |      |     |      |       |        | 5    | 205.87 | 197.24 | 45.11 | 241  |
|              |     |        |      |     |      |       |        | 32.9 | 72.07  | n/a    | 297.0 | 1000 |
| MD808120     | 51  | 218.17 | 0.74 | 370 | 1.15 | 25.80 | 254.18 | n/a  | n/a    | n/a    | n/a   | 2000 |
|              |     |        |      |     |      |       |        | 0.5  | 250.69 | 240.35 | 4.24  | 22   |
|              |     |        |      |     |      |       |        | 3    | 233.95 | 224.72 | 25.47 | 125  |
|              |     |        |      |     |      |       |        | 5    | 221.37 | 213.08 | 42.44 | 204  |
|              |     |        |      |     |      |       |        | 36.4 | 92.93  | n/a    | 309.0 | 1000 |
| MD808221     | 54  | 219.79 | 0.74 | 370 | 1.15 | 25.80 | 269.43 | n/a  | n/a    | n/a    | n/a   | 2000 |
|              |     |        |      |     |      |       |        | 0.5  | 265.59 | 254.59 | 4.21  | 23   |

|          |    |        |      |     |      |       |        |      |        |        |       |      |
|----------|----|--------|------|-----|------|-------|--------|------|--------|--------|-------|------|
| MD808321 | 69 | 220.64 | 0.72 | 285 | 1.15 | 25.80 | 245.39 | 3    | 247.22 | 237.20 | 25.28 | 132  |
|          |    |        |      |     |      |       |        | 5    | 233.44 | 224.32 | 42.13 | 214  |
|          |    |        |      |     |      |       |        | 34.2 | 100.89 | n/a    | 288.6 | 1000 |
|          |    |        |      |     |      |       |        | n/a  | n/a    | n/a    | n/a   | 2000 |
|          |    |        |      |     |      |       |        | 0.5  | 242.14 | 232.17 | 4.20  | 21   |
|          |    |        |      |     |      |       |        | 3    | 226.56 | 217.74 | 25.18 | 120  |
|          |    |        |      |     |      |       |        | 5    | 214.81 | 206.94 | 41.97 | 195  |
|          |    |        |      |     |      |       |        | 38.3 | 88.42  | n/a    | 321.9 | 1000 |
|          |    |        |      |     |      |       |        | n/a  | n/a    | n/a    | n/a   | 2000 |
|          |    |        |      |     |      |       |        | 0.5  | 232.31 | 222.77 | 4.31  | 20   |
| MD808720 | 64 | 214.90 | 0.70 | 285 | 1.15 | 25.80 | 235.41 | 3    | 217.43 | 209.13 | 25.85 | 118  |
|          |    |        |      |     |      |       |        | 5    | 206.21 | 198.90 | 43.09 | 192  |
|          |    |        |      |     |      |       |        | 39.2 | 83.28  | n/a    | 338.1 | 1000 |
|          |    |        |      |     |      |       |        | n/a  | n/a    | n/a    | n/a   | 2000 |
|          |    |        |      |     |      |       |        | 0.5  | 265.59 | 254.59 | 4.21  | 23   |
| MD808821 | 54 | 219.79 | 0.74 | 370 | 1.15 | 25.80 | 269.43 | 3    | 247.22 | 237.20 | 25.28 | 132  |
|          |    |        |      |     |      |       |        | 5    | 233.44 | 224.32 | 42.13 | 214  |
|          |    |        |      |     |      |       |        | 34.2 | 100.89 | n/a    | 288.6 | 1000 |
|          |    |        |      |     |      |       |        | n/a  | n/a    | n/a    | n/a   | 2000 |
|          |    |        |      |     |      |       |        | 0.5  | 265.59 | 254.59 | 4.21  | 23   |

n/a (not applicable) means that the WV does not sink 1000 or 2000 ft, or  $\Gamma$  is null, with the corresponding sinking model.
